# Supplementary material for: Highly sensitive optical temperature sensing based on pump-power-dependent upconversion luminescence in LiZnPO4:Yb3+–Er3+/Ho3+ phosphors
Source: Royal Society of Chemistry journal article supplement (doi:10.1039/d1ra06049j), 2021-01-01
Supplement: d1ra06049j1.pdf [file d1ra06049j1.pdf]

**Highly sensitive optical temperature sensing based on pump-power-dependent upconversion luminescence in  $\text{LiZnPO}_4$ :  $\text{Yb}^{3+}$ - $\text{Er}^{3+}/\text{Ho}^{3+}$  phosphors.**

**Kamel Saidi<sup>1\*</sup>, Wajdi Chaabani<sup>2</sup>, Mohamed Dammak<sup>1</sup>.**

<sup>1</sup> Laboratoire de Physique Appliquée, Groupe des Matériaux Luminescents, Faculté des Sciences de Sfax, Département de Physique, Université de Sfax, BP, 1171, Sfax, Tunisie.

<sup>2</sup> Laboratoire de Physique des Solides, CNRS, Université Paris-Saclay, Orsay 91405, France.

**\*corresponding author: Kamel Saidi, [saidikamel494@gmail.com](mailto:saidikamel494@gmail.com)**

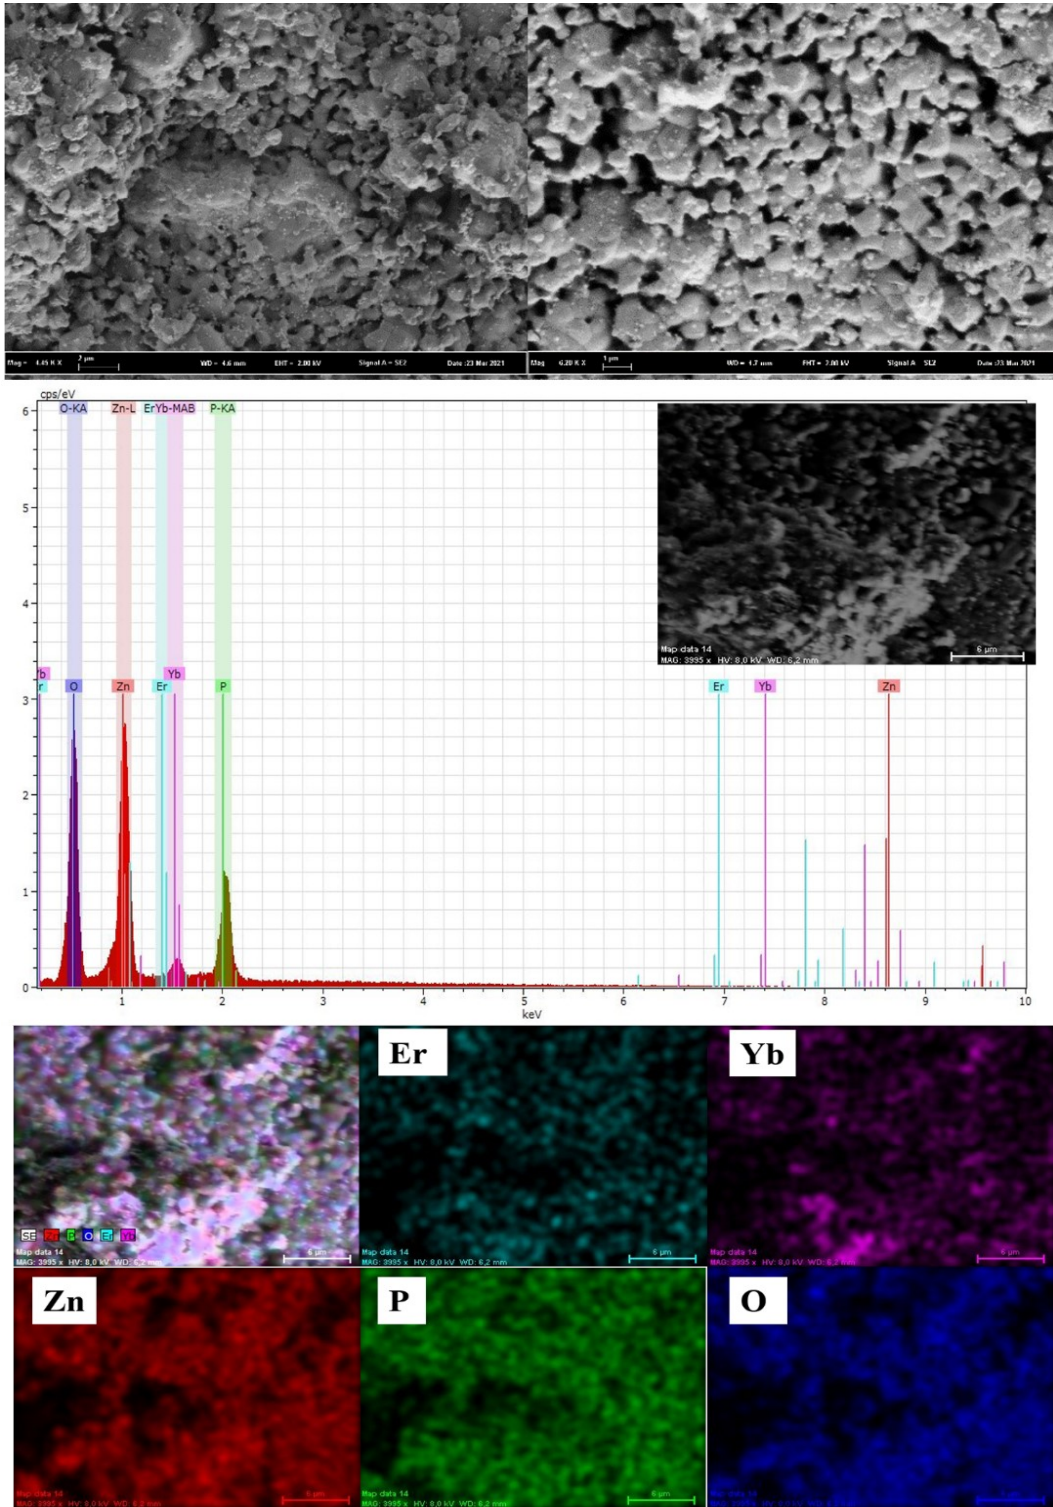

**Fig. S1** (a) SEM microscopic morphology image, (b) EDS spectrum, and (c) elemental mapping graphs of  $\text{LiZnPO}_4$  co doped  $0.5\% \text{Er}^{3+}/5\% \text{Yb}^{3+}$ .

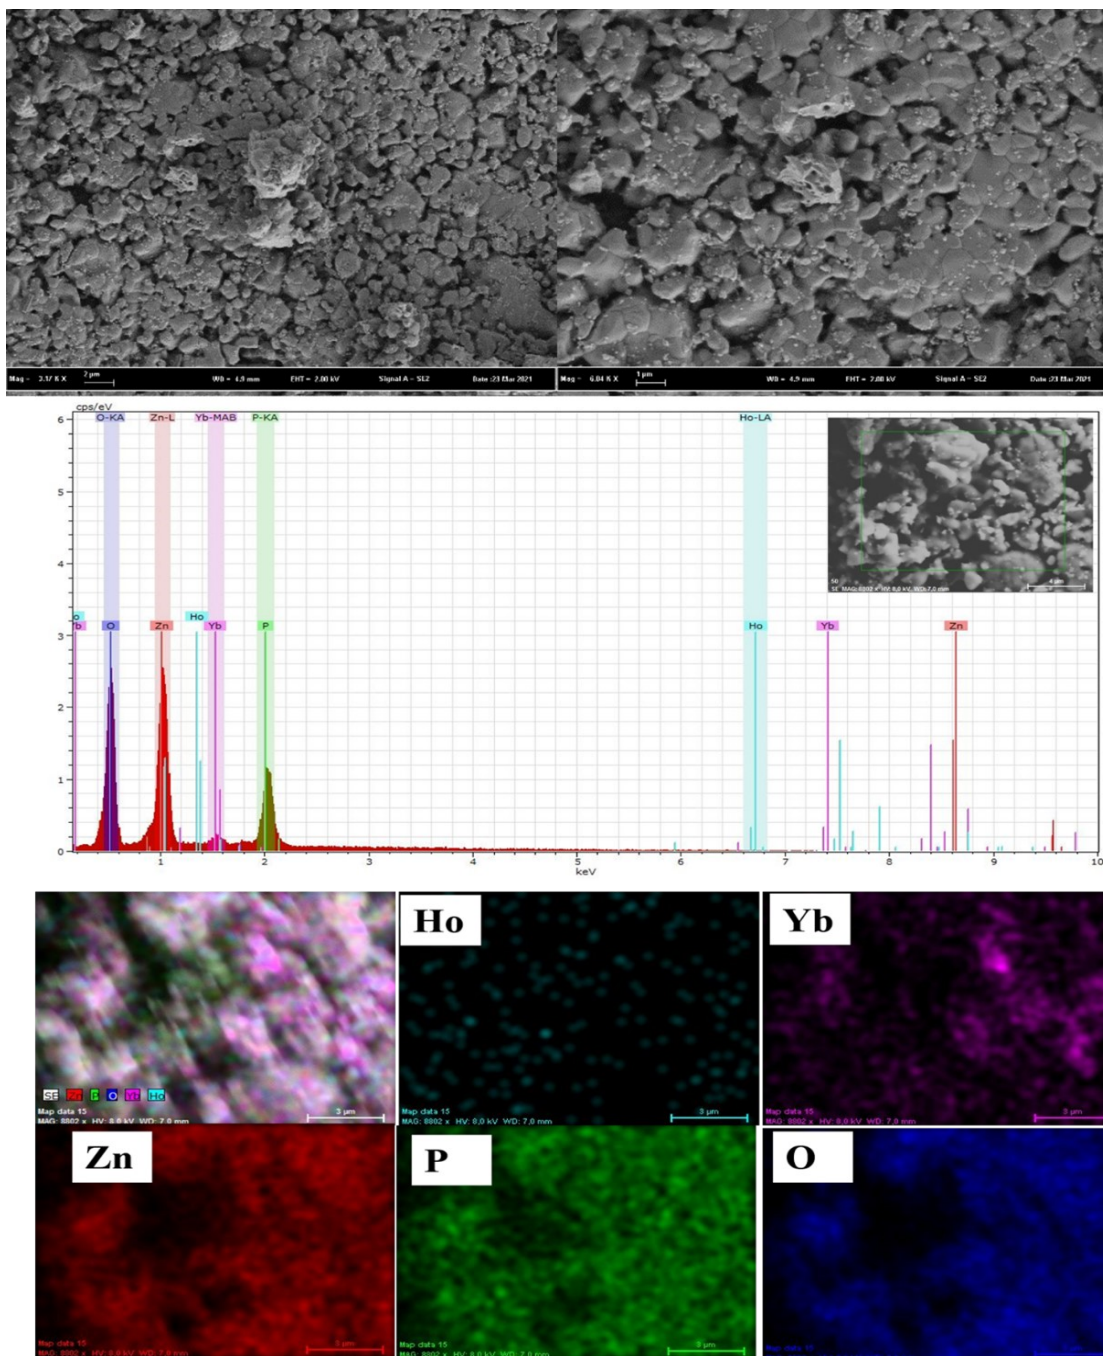

**Fig. S2** (a) SEM microscopic morphology image, (b) EDS spectrum, and (c) elemental mapping graphs of  $\text{LiZnPO}_4$  co doped  $0.5\% \text{Ho}^{3+}/3\% \text{Yb}^{3+}$ .

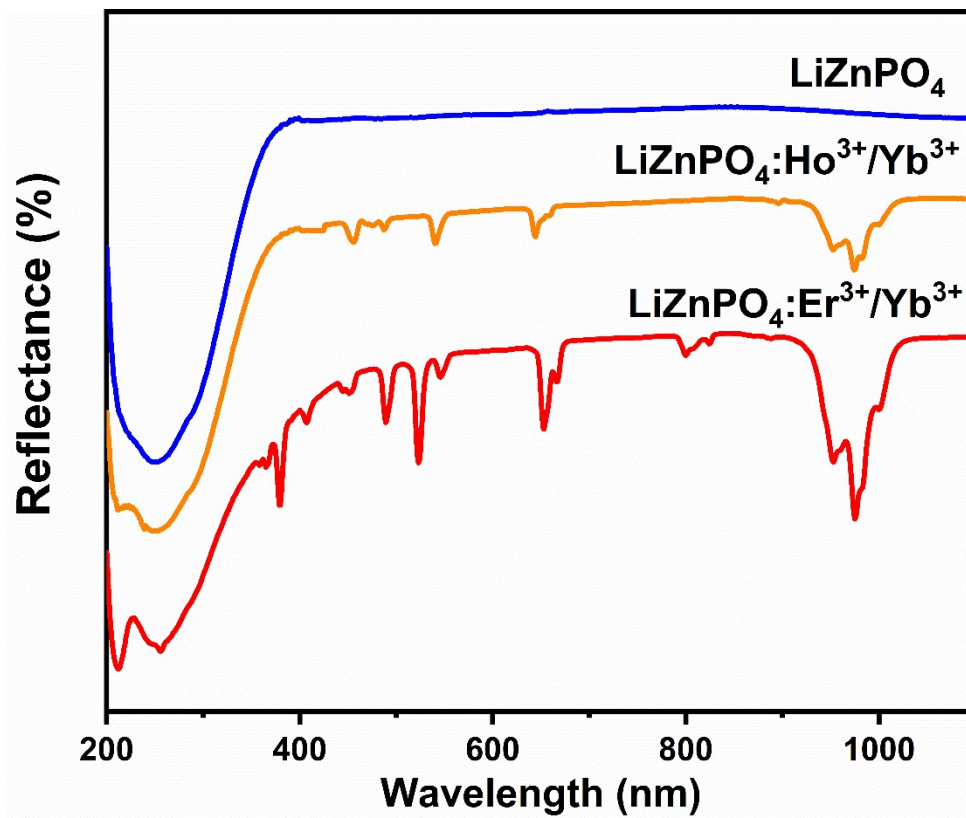

Fig. S3: Diffuse reflectance spectra (DRS) of  $\text{LiZnPO}_4$   $\text{Er}^{3+}$ ,  $\text{Ho}^{3+}/\text{Yb}^{3+}$ .

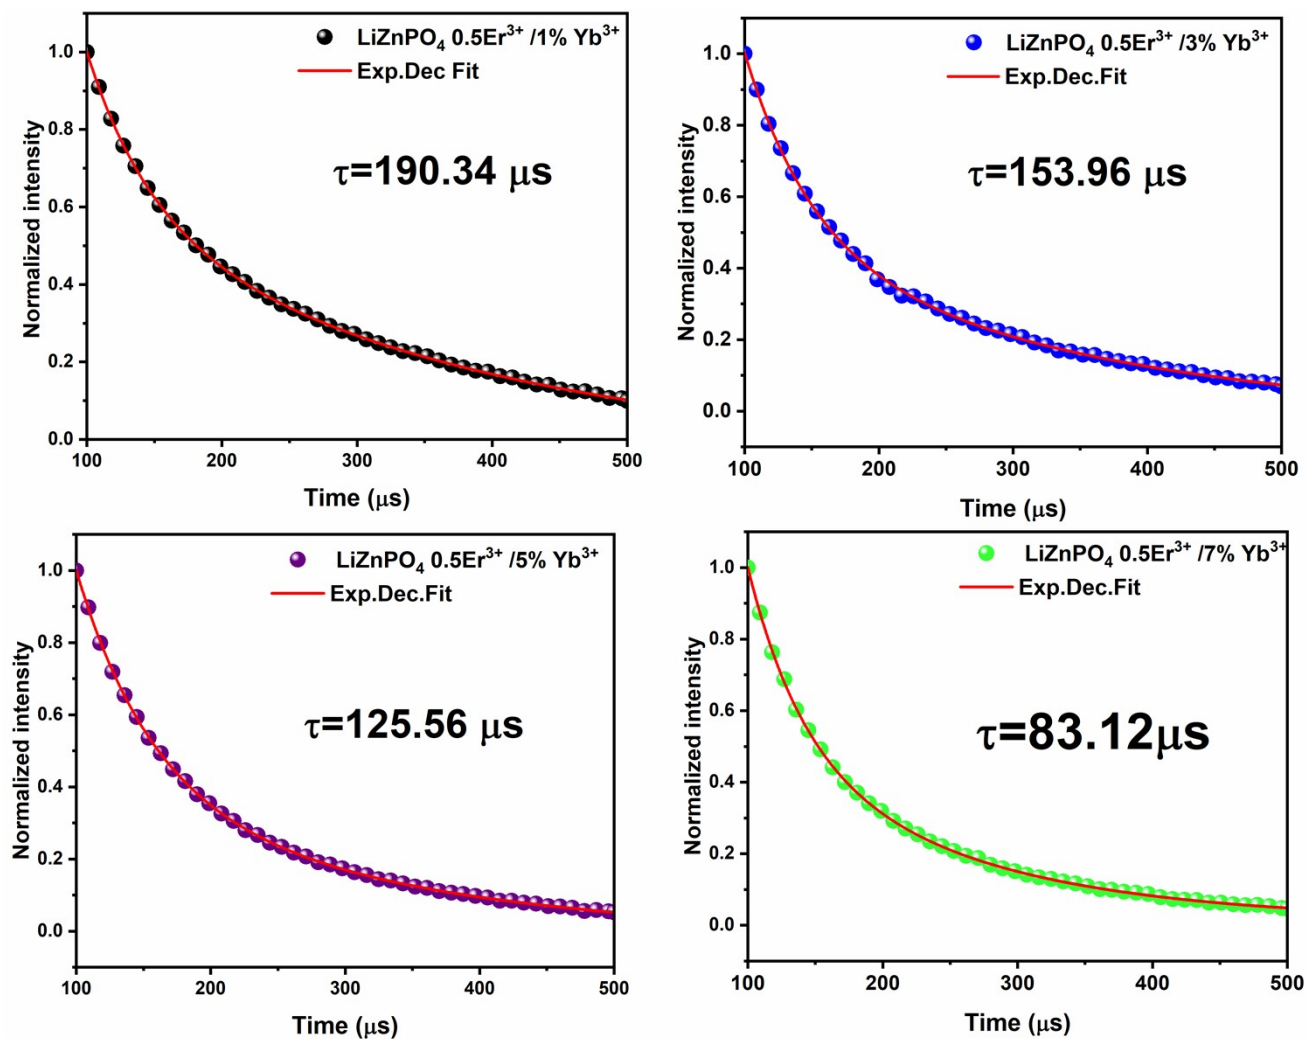

**Fig. S4.** Decay curves of 521 nm emissions of LiZnPO<sub>4</sub>:0.5% Er<sup>3+</sup>/ x% Yb<sup>3+</sup> (x = 1, 3, 5 and 7) samples ( $\lambda_{\text{ex}} = 980$  nm).

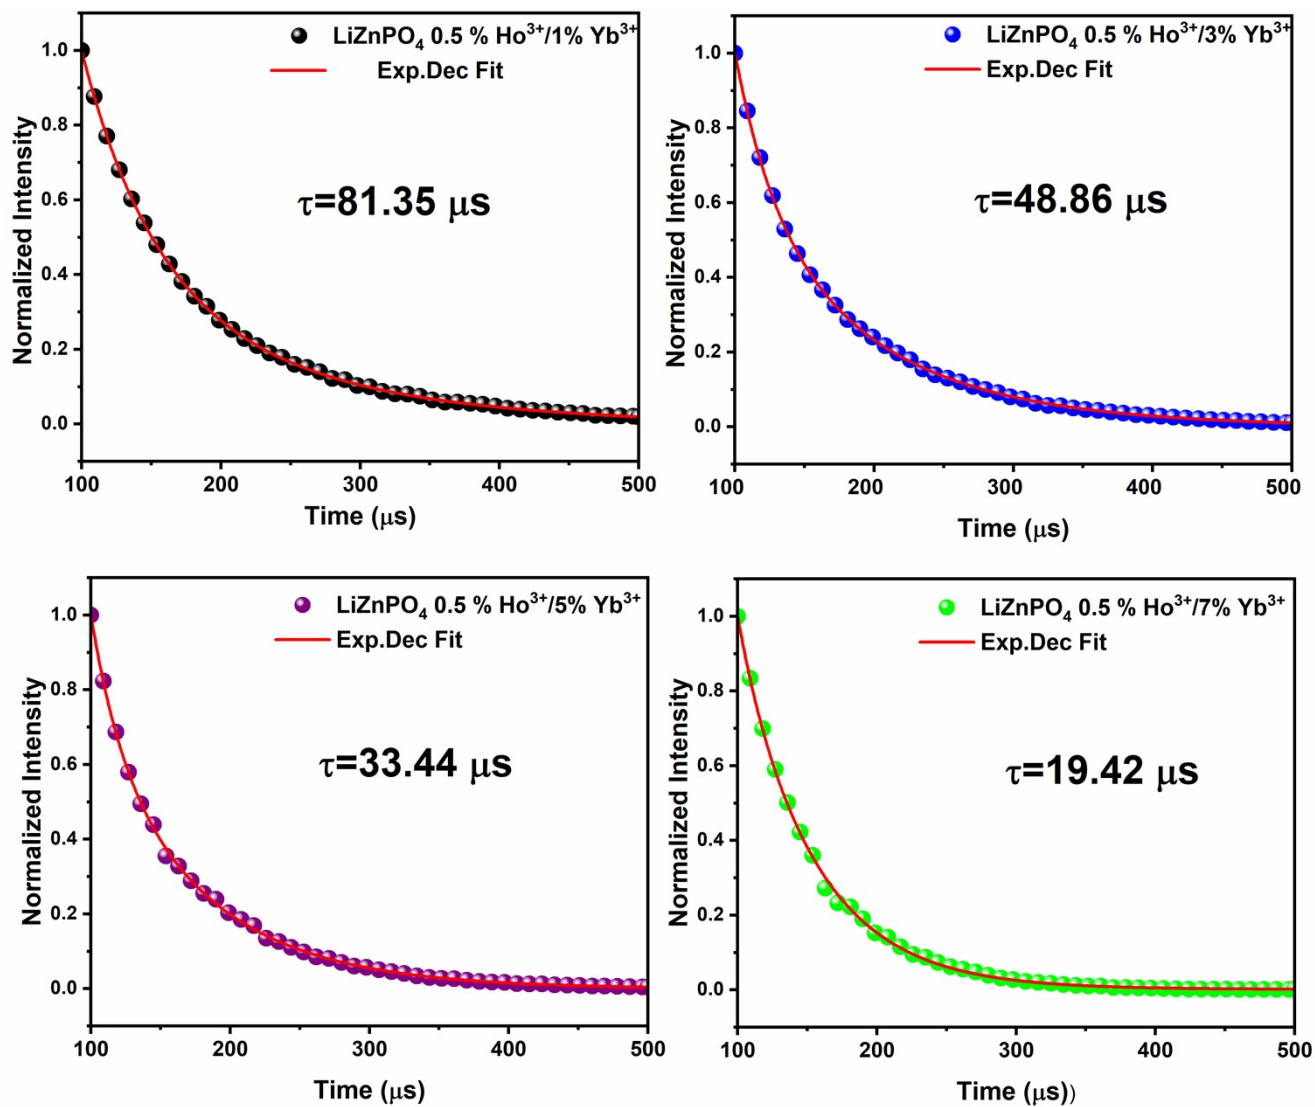

**Fig. S5.** Decay curves of 670 nm emissions of LiZnPO<sub>4</sub>: 0.5% Ho<sup>3+</sup>/ y%Yb<sup>3+</sup> (y = 1, 3, 5 and 7) samples ( $\lambda_{\text{ex}} = 980$  nm).

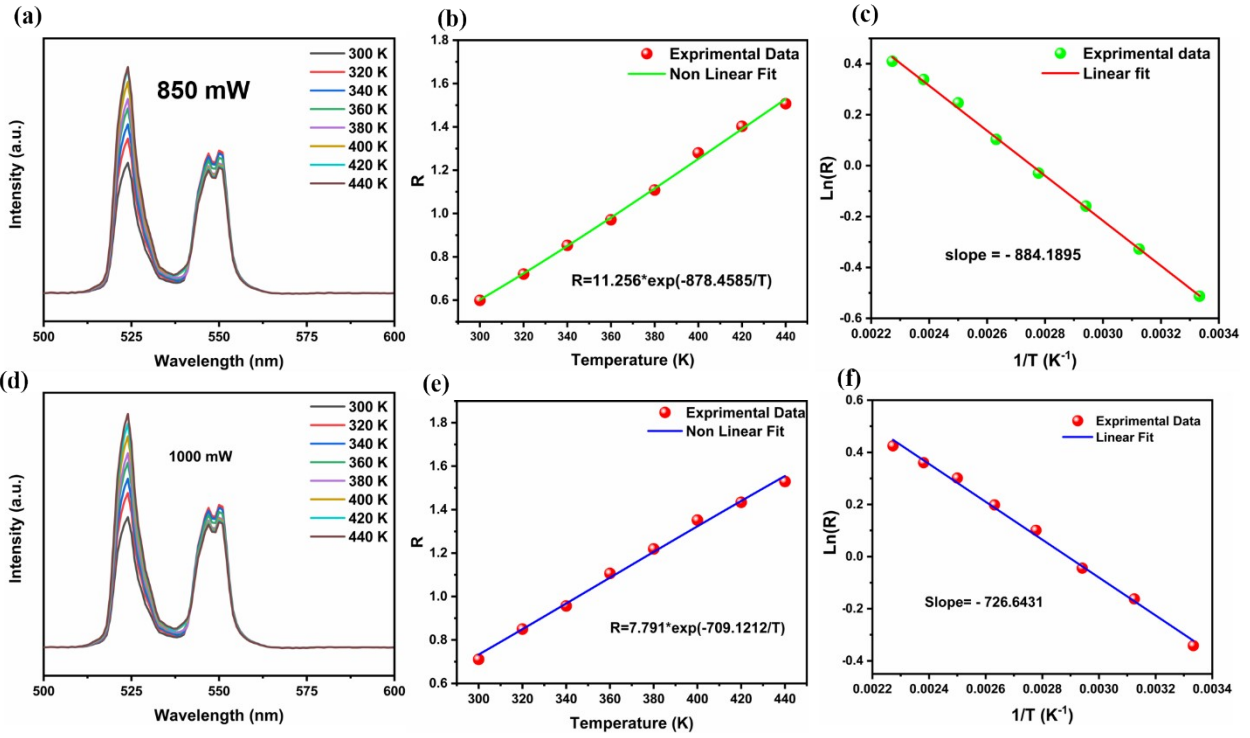

**Fig. S6** (a) Uv emission spectra of LiZnPO<sub>4</sub>: 5% Yb<sup>3+</sup>, 0.5% Er<sup>3+</sup> excited under various temperatures, (b-e) dependence of R on absolute temperature. (c-f) dependence of Ln(R)

as a function of 1/T.
